# Supplementary material
Source: PubMed Central journal article supplement (PMC3023510)
Supplement: supp_M110.148395_jbc.M110.148395-1.pdf [file supp_M110.148395_jbc.M110.148395-1.pdf]

## SUPPLEMENTAL DATA

**Supplemental Figure. Treeview display of Met-1 cells in culture of microarray analysis.** DACH1 stably cell lines (N=3) vs vector control (N=3). Green represents repression and red induction of gene expression.

**Supplemental Table.** Level of gene expression for each gene are shown in Table 1.

# Supplementary Figure

Met-1 cells  
**DACH1**      **Control**

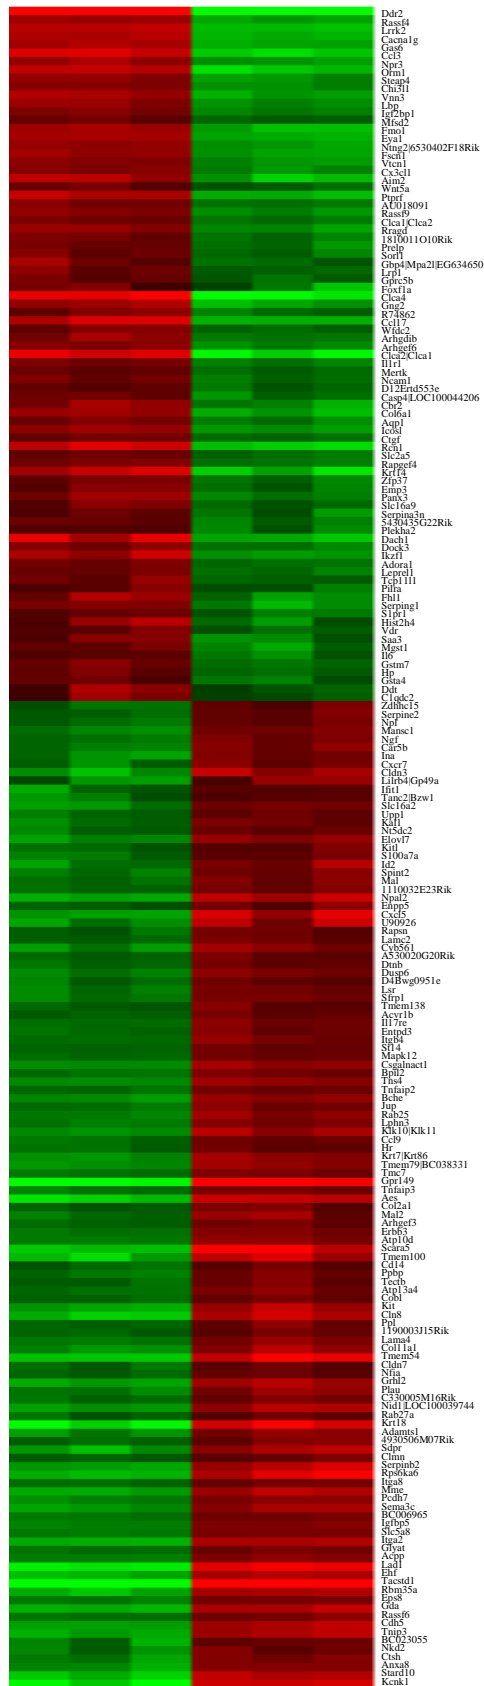

Supplemental Table 1

| Transcript | genbank  | genesymbol  | genesdescription                                                            | FCAbsolute | p-value  | Aliases                                                                                                                                           | UniProt_Function                                                                                                                                                                                                                                                      |
|------------|----------|-------------|-----------------------------------------------------------------------------|------------|----------|---------------------------------------------------------------------------------------------------------------------------------------------------|-----------------------------------------------------------------------------------------------------------------------------------------------------------------------------------------------------------------------------------------------------------------------|
| 6764010    | X76505   | Ddr2        | discoidin domain receptor family, member 2                                  | 13.20273   | 6.91E-07 | OTTHUMP00000338368 [NTRKR3<br>OTTHUMP0000032332 [TYRO10<br>[MG20a [TKT [EC 2.7.10.1                                                               | SwissProt: Q16832 # This tyrosine kinase receptor for fibrillar collagen mediates fibroblast migration and proliferation. Contributes to cutaneous wound healing (By similarity)                                                                                      |
| 6910129    | AY008277 | Clca4       | chloride channel calcium activated 4                                        | 7.867944   | 1.12E-05 | hCLCA4 [OTTHUMP0000011915<br>[CaCC [MGC142247 [CaCC-2 [CaCC2<br>[MGC142249 [hCaCC-2                                                               | SwissProt: Q14CNZ # May be involved in mediating calcium-activated chloride conductance                                                                                                                                                                               |
| 6910126    | AF047638 | Clca2/Clca1 | chloride channel calcium activated 2   chloride channel calcium activated 1 | 6.500951   | 2.17E-05 |                                                                                                                                                   |                                                                                                                                                                                                                                                                       |
| 6790294    | M23447   | Ccl3        | chemokine (C-C motif) ligand 3                                              | 5.489417   | 8.60E-06 | G0S19-1 [SCYA3 [SIS-beta [MIP1A<br>MIP-1-alpha [LD78ALPHA                                                                                         | SwissProt: P10147 # Monokine with inflammatory and chemokinetic properties. Binds to CCR1, CCR4 and CCR5. One of the major HIV-suppressive factors produced by CD8+ T-cells. Recombinant MIP-1-alpha induces a dose-dependent inhibition of different strains of      |
| 689413     | D13003   | Rcn1        | reticulocalbin 1                                                            | 5.268672   | 2.02E-05 | RCN [Rcal [FLJ37041 [PIG20 [RCAL<br>K14 [Cytokeratin-14 [NFJ [CK-14<br>CK14 [EBS3 [EBS4 [Keratin-14                                               | SwissProt: Q15293 # May regulate calcium-dependent activities in the endoplasmic reticulum lumen or post-ER compartment                                                                                                                                               |
| 6791408    | BC011074 | Krt14       | keratin 14                                                                  | 4.878441   | 2.17E-04 |                                                                                                                                                   |                                                                                                                                                                                                                                                                       |
| 6914007    | M27008   | Osm1        | orosomucoid 1                                                               | 4.810838   | 1.64E-05 | Orosomucoid-1<br>OTTHUMP0000022741 [AGP1 [AGP-<br>A [ORM                                                                                          | SwissProt: P02763 # Appears to function in modulating the activity of the immune system during the acute-phase reaction                                                                                                                                               |
| 6826883    | AF129510 | Dach1       | dachshund 1 (Drosophila)                                                    | 4.674828   | 2.40E-04 | DACH [Dach1<br>OTTHUMP0000018493<br>OTTHUMP0000040839 [EL110138<br>OTTHUMP0000164673 [ABCD-2<br>[MGC138273 [SCYA17 [TARC<br>[MGC138271 [A-152E5.3 | SwissProt: Q09U36 # Transcription factor that is involved in regulation of organogenesis. Seems to be a regulator of SIX1, SIX6 and probably SIX5. Corepression of precursor cell proliferation in myoblasts by SIX1 is switched to coactivation through recruit      |
| 6978336    | AF125571 | Ccl17       | chemokine (C-C motif) ligand 17                                             | 4.546633   | 3.47E-05 |                                                                                                                                                   | SwissProt: Q22593 # Chemotactic factor for T-lymphocytes but not monocytes or granulocytes. May play a role in T-cell development in thymus and in trafficking and activation of mature T-cells. Binds to CCR4                                                        |
| 6832713    | AY792512 | Lrrk2       | leucine-rich repeat kinase 2                                                | 4.381855   | 2.95E-07 | AURA17 [RIPK7 [ROCO2 [DARDARIN<br>[FLJ45829 [PARK8 [DKFZP434H2111<br>[Dardarin [EC 2.7.11.1                                                       | SwissProt: Q5S007 # Probable protein kinase whose role is not yet known. May play a role in the phosphorylation of proteins central to Parkinson disease. May also have GTPase activity                                                                               |
| 6924882    | AF300943 | Ptpfr       | protein tyrosine phosphatase, receptor type, F                              | 4.045665   | 1.86E-05 | FLJ43335 [OTTHUMP0000008684<br>[FLJ45062 [LAR [LCA-homolog<br>[FLJ45567 [EC 3.1.3.48                                                              | SwissProt: P10586 # The first PTPase domain has enzymatic activity, while the second one seems to affect the substrate specificity of the first one                                                                                                                   |
| 6755282    | BC009664 | Aim2        | absent in melanoma 2                                                        | 3.998569   | 2.86E-04 | PYHIN4 [OTTHUMP0000035296                                                                                                                         | SwissProt: Q14862 # Tumor suppressor which may act by repressing NF-kappa-B transcriptional activity                                                                                                                                                                  |
| 6790947    | BC057399 | Caona1g     | calcium channel, voltage-dependent, T type, alpha 1G subunit                | 3.943078   | 8.81E-07 | KIAA1123 [Cav3.1 [Cav3.1c [Ca(V)T.1<br>[INBR13 [MGC117234                                                                                         | SwissProt: Q13497 # Voltage-sensitive calcium channels (VSCC) mediate the entry of calcium ions into excitable cells and are also involved in a variety of calcium-dependent processes, including muscle contraction, hormone or neurotransmitter release, gene       |
| 6763623    | BC011229 | Fmo1        | flavin containing monooxygenase 1                                           | 3.708622   | 2.41E-05 | OTTHUMP0000033536<br>OTTHUMP0000033537 [EC<br>1.14.13.8                                                                                           | SwissProt: Q01740 # This protein is involved in the oxidative metabolism of a variety of xenobiotics such as drugs and pesticides. Form I catalyzes the N-oxygenation of secondary and tertiary amines                                                                |
| 6757035    | BC060280 | Eya1        | eyes absent 1 homolog (Drosophila)                                          | 3.652037   | 4.37E-07 | MGC141875 [BOR [BOP<br>OTTHUMP00000195053 [EC 3.1.3.48                                                                                            | SwissProt: Q14393 # Ligand for tyrosine-protein kinase receptors AXL, TYRO3 and MER whose signaling is implicated in cell growth and survival, cell adhesion and cell migration. Plays a role in thrombosis by amplifying platelet aggregation and secretion in       |
| 6980568    | BC005444 | Gas6        | growth arrest specific 6                                                    | 3.640159   | 1.46E-06 | FLJ34709 [AXLLG [GAS-6 [AXSF<br>[DKFZp666G247<br>OTTHUMP0000018777                                                                                | SwissProt: P59768 # Guanine nucleotide-binding proteins (G proteins) are involved as a modulator or transducer in various transmembrane signaling systems. The beta and gamma chains are required for the GTPase activity, for replacement of GDP by GTP, and f       |
| 6823007    | BC021599 | Gnp2        | guanine nucleotide binding protein (G protein), gamma 2                     | 3.505411   | 6.84E-05 |                                                                                                                                                   |                                                                                                                                                                                                                                                                       |
| 6766577    | BC111521 | Vnn3        | vanin 3                                                                     | 3.480773   | 3.00E-05 | PAGEL-alpha [PAGEL-eta<br>[pantheinase [MGC171203<br>[HSA238982 [PAGEL-zeta [PAGEL-<br>delta [PAGEL-beta [Vanin-3 [PAGEL-<br>gamma [PAGEL-epsilon | SwissProt: Q9NY84 # Probable hydrolase                                                                                                                                                                                                                                |
| 6778794    | AK220235 | Izf1        | IKAROS family zinc finger 1                                                 | 3.449625   | 1.93E-04 | Ikf.54452 [PRO0758 [Ihk-1 [IK1<br>[IKAROS [LYF1 [ZNFN1A1 [LYF-1                                                                                   | SwissProt: Q13422 # Binds and activates the enhancer (delta-A element) of the CD3-delta gene. Functions in the specification and the maturation of the T-lymphocyte. Also interacts with a critical control element in the TDT (terminal deoxynucleotidyltransferase) |
| 6775185    | X66405   | Col8a1      | collagen, type VI, alpha 1                                                  | 3.449291   | 3.77E-05 | COL8                                                                                                                                              | SwissProt: P12109 # Collagen VI acts as a cell-binding protein                                                                                                                                                                                                        |
| 6956765    | BC060709 | Rasaf4      | Ras association (RalGDS/AF-6) domain family member 4                        | 3.28936    | 1.67E-06 | OTTHUMP0000019493 [MGC44914<br>[AD037                                                                                                             | SwissProt: Q9H2L5 # Potential tumor suppressor. May act as a KRAS effector protein. May promote apoptosis and cell cycle arrest                                                                                                                                       |
| 6935370    | BC052408 | Fscn1       | fascin homolog 1, actin bundling protein (Strongylocentrotus purpuratus)    | 3.203644   | 1.05E-05 | FAN1 [HSN [FLJ38511 [SNL [p55                                                                                                                     | SwissProt: Q16658 # Organizes filamentous actin into bundles with a minimum of 4:1:1 actin:fascin ratio. Probably involved in the assembly of actin filament bundles present in microspikes, membrane ruffles, and stress fibers                                      |
| 6834029    | BC055897 | Npr3        | natriuretic peptide receptor 3                                              | 3.109566   | 1.91E-05 | GUCY2B [NPRC [ANPRC [NPR-C<br>[ANP-C                                                                                                              | SwissProt: P17342 # Receptor for natriuretic peptide hormones. Has broad specificity and can bind several distinct natriuretic peptides, including atrial natriuretic peptide (ANP) and brain natriuretic peptide (BNP). Does not have guanylate cyclase acti         |
| 6769033    | BC029227 | Icosl       | icos ligand                                                                 | 3.089205   | 9.36E-06 | [ICOSL [B7RP1 [B7RP-1 [LICOS<br>[KIAA0653 [GL50<br>OTTHUMP0000019624 [ICOS-L<br>[CD275 [B7H2 [B7-H2                                               | SwissProt: Q75144 # Ligand for the T-cell-specific cell surface receptor ICOS. Acts as a costimulatory signal for T-cell proliferation and cytokine secretion; induces also B-cell proliferation and differentiation into plasma cells. Could play an important       |
| 6885671    | AF475080 | Nnq2/E53040 | netrin G2   RIKEN cDNA 6530402F18 gene                                      | 3.078946   | 6.15E-06 |                                                                                                                                                   |                                                                                                                                                                                                                                                                       |
| 6912517    | BC038137 | Rragd       | Ras-related GTP binding D                                                   | 2.944259   | 6.04E-05 | DKFZP761H171 [FLJ44176<br>[h1108.2.1 [RagD<br>OTTHUMP0000016853<br>[DKFZp761H171 [RAGD                                                            | SwissProt: Q9NQL2 # Has guanine nucleotide-binding activity but lacks intrinsic GTPase activity                                                                                                                                                                       |
| 6928716    | BC006651 | Steap4      | STEAP family member 4                                                       | 2.911707   | 3.90E-05 | DKFZp666D049 [STAMP2 [TIARP<br>[TNFAIP9 [FLJ23153 [EC 1.16.1.-                                                                                    | SwissProt: Q687X5 # Metalloreductase that has the ability to reduce both Fe(3+) to Fe(2+) and Cu(2+) to Cu(1+). Uses NAD(+) as acceptor (By similarity)                                                                                                               |
| 6882730    | BC004795 | Lbp         | lipopolysaccharide binding protein                                          | 2.898152   | 2.56E-05 | OTTHUMP0000030965 [MGC22233                                                                                                                       | SwissProt: P18428 # Binds to the lipid A moiety of bacterial lipopolysaccharides (LPS), a glycolipid present in the outer membrane of all Gram-negative bacteria. The LBP/LPS complex seems to interact with the CD14 receptor                                        |
| 6792814    | BC010758 | Cbr2        | carbonyl reductase 2                                                        | 2.881359   | 6.66E-04 |                                                                                                                                                   |                                                                                                                                                                                                                                                                       |
| 6899966    | AY346099 | Vtcn1       | V-set domain containing T cell activation inhibitor 1                       | 2.811154   | 1.83E-05 | B7h.5 [FLJ22418 [B7-H4 [B7H4 [B7X<br>OTTHUMP0000013947 [PRO1291<br>[B7S1 [VCTN1 [RP11-229A19.4                                                    | SwissProt: Q7Z7D3 # Negatively regulates T-cell-mediated immune response by inhibiting T-cell activation, proliferation, cytokine production and development of cytotoxicity. When expressed on the cell surface of tumor macrophages, plays an important role.       |

|         |          |             |                                                                                   |          |          |                                                                                                                                                                                 |                                                                                                                                                                                                                                                                 |
|---------|----------|-------------|-----------------------------------------------------------------------------------|----------|----------|---------------------------------------------------------------------------------------------------------------------------------------------------------------------------------|-----------------------------------------------------------------------------------------------------------------------------------------------------------------------------------------------------------------------------------------------------------------|
| 6791072 | BC051679 | Igf2bp1     | insulin-like growth factor 2 mRNA binding protein 1                               | 2.510551 | 1.29E-05 | CRD-BP [VICKZ1  IMP-1] CRDBP<br>IMP1  ZBP1                                                                                                                                      | SwissProt: Q9NZB8 # RNA-binding factor that affects mRNA nuclear export, localization, stability and translation. Binds to the 5'-UTR of the insulin-like growth factor 2 (IGF2) mRNA and regulates its subcellular localization and translation. Binds both to |
| 6907255 | BC057955 | Hist2H4     | histone cluster 2, H4                                                             | 2.496719 | 0.006073 | H4/J  H4FC  H4/O  H4FN  H4FI  H4/H  H4FA  H4FH  H4F2  H4FM  H4/A  H4FK  H4FG  H4/G  H4FJ  H4ST2H4  H4FD  H4FE  H4/I  H4/K  H4FO  H4/B  H4/N  H4/E  H4/C  H4/D  H4/M  H4/A  H4/E | SwissProt: P62805 # Core component of nucleosome. Nucleosomes wrap and compact DNA into chromatin, limiting DNA accessibility to the cellular machineries which require DNA as a template. Histones thereby play a central role in transcription regulation, DN |
| 6998603 | AY145302 | Dock3       | dedicator of cyto-kinesis 3                                                       | 2.418528 | 8.91E-05 | KIAA0299  PBP  MOCA                                                                                                                                                             | SwissProt: Q8IZD9 # Potential guanine nucleotide exchange factor (GEF). GEF proteins activate some small GTPases by exchanging bound GDP for free GTP. Its interaction with presenilin proteins as well as its ability to stimulate Tau/MAPT phosphorylation su |
| 6748884 | M20658   | Il1r1       | interleukin 1 receptor, type I                                                    | 2.386177 | 2.06E-05 | IL-1R-1  IL1R  P80  OTTHUMP00000161344  IL1R1T1  IL1RA  IL-1R-alpha  CD121A  IL-1R1  p80  D2S1473                                                                               | SwissProt: P14778 # Receptor for interleukin-1 alpha (IL-1A), beta (IL-1B), and interleukin-1 receptor antagonist protein (IL-1RA). Binding to the agonist leads to the activation of NF-kappa-B. Signaling involves formation of a ternary complex containing  |
| 6944406 | L02914   | Aqp1        | aquaporin 1                                                                       | 2.373978 | 1.25E-04 | Aquaporin-CHIP  MGC26324  AQP-CHIP  CO  CHIP28  AQP-1                                                                                                                           | SwissProt: P29972 # Forms a water-specific channel that provides the plasma membranes of red cells and kidney proximal tubules with high permeability to water, thereby permitting water to move in the direction of an osmotic gradient                        |
| 6967059 | BC055885 | Saa3        | serum amyloid A 3                                                                 | 2.349319 | 0.002177 | SAA3                                                                                                                                                                            | SwissProt: Q8WZA2 # Guanine nucleotide exchange factor (GEF) for RAP1A, RAP1B and RAP2A small GTPases that is activated by binding cAMP. Seems not to activate RAB3A. Involved in cAMP-dependent, PKA-independent exocytosis through interaction with RIMS2 (By |
| 6878038 | AK220281 | Rapgef4     | Rap guanine nucleotide exchange factor (GEF) 4                                    | 2.332753 | 1.69E-05 | OTTHUMP00000165043  CAMP-GEFII  cAMP-GEFII  Nbia00496  EPAC2  CGEF2  OTTHUMP00000165043                                                                                         | SwissProt: P10620 # Conjugation of reduced glutathione to a wide number of exogenous and endogenous hydrophobic electrophiles. Has a wide substrate specificity                                                                                                 |
| 7003143 | BC080703 | AUO18091    |                                                                                   | 2.329828 | 2.05E-05 |                                                                                                                                                                                 | SwissProt: Q9Y6Q3 # May be involved in transcriptional regulation                                                                                                                                                                                               |
| 6950582 | BC009155 | Mgst1       | microsomal glutathione S-transferase 1                                            | 2.320335 | 0.001351 | GST12  MGC14525  MGST  MGST-1  EC 2.5.1.18                                                                                                                                      | SwissProt: P13591 # This protein is a cell adhesion molecule involved in neuron-neuron adhesion, neurite fasciculation, outgrowth of neurites, etc                                                                                                              |
| 6979570 | BC005669 | Foxl1a      | forkhead box F1a                                                                  | 2.308121 | 0.012143 |                                                                                                                                                                                 |                                                                                                                                                                                                                                                                 |
| 6972339 | BC005669 | R74862      |                                                                                   | 2.269749 | 5.10E-04 |                                                                                                                                                                                 |                                                                                                                                                                                                                                                                 |
| 6922209 | BC063757 | Zfp37       | zinc finger protein 37                                                            | 2.267329 | 2.59E-04 | OTTHUMP0000022750  FLJ38524  Zfp-37                                                                                                                                             |                                                                                                                                                                                                                                                                 |
| 6910123 | AF047838 | Clca1 Clca2 | chloride channel calcium activated 1   chloride channel calcium activated 2       | 2.255458 | 1.81E-05 |                                                                                                                                                                                 |                                                                                                                                                                                                                                                                 |
| 6981091 | BC016562 | 181001 O10R | RIKEN cDNA 181001 O10 gene                                                        | 2.253686 | 1.40E-04 |                                                                                                                                                                                 |                                                                                                                                                                                                                                                                 |
| 6762328 | BC019775 | Prelp       | proline arginine-rich end leucine-rich repeat                                     | 2.243225 | 3.71E-04 | MSTP161  prolargin  OTTHUMP0000034099  SLR2A  MST161  MGC45323                                                                                                                  | SwissProt: P51888 # May anchor basement membranes to the underlying connective tissue (By similarity)                                                                                                                                                           |
| 6967017 | BC001999 | Emp3        | epithelial membrane protein 3                                                     | 2.241378 | 0.001026 | HMP-1  YMP  EMP-3                                                                                                                                                               | SwissProt: P54852 # Probably involved in cell proliferation and cell-cell interactions                                                                                                                                                                          |
| 6940648 | EF494423 | Gbp4 Mpa2 E | guanylate nucleotide binding protein 4   macrophage activation 2 like 1 (predict) | 2.207654 | 0.00221  |                                                                                                                                                                                 |                                                                                                                                                                                                                                                                 |
| 6762353 | BC079624 | Adora1      | adenosine A1 receptor                                                             | 2.204086 | 1.67E-05 | OTTHUMP0000039090  RDC7  OTTHUMP0000039091                                                                                                                                      | SwissProt: P30542 # Receptor for adenosine. The activity of this receptor is mediated by G proteins which inhibit adenylyl cyclase                                                                                                                              |
| 6944806 | AJ430350 | Leprel1     | leprecan-like 1                                                                   | 2.203971 | 1.17E-04 | FLJ10719  P382  MLA74  EC 1.14.11.7                                                                                                                                             | SwissProt: Q81VLS # Has prolyl 3-hydroxylase activity catalyzing the post-translational formation of 3-hydroxyproline in Xaa-Pro-Gly-sequences in collagens, especially types IV and V (By similarity)                                                          |
| 6986649 | BC061255 | Casp4 LOC10 | caspase 4, apoptosis-related cysteine peptidase   hypothetical protein LOC10      | 2.197047 | 4.71E-04 |                                                                                                                                                                                 |                                                                                                                                                                                                                                                                 |
| 6995454 | BC011310 | Ncam1       | neural cell adhesion molecule 1                                                   | 2.191002 | 1.33E-04 | MSK39  N-CAM-1  JCD56  NCAM-1  NCAM                                                                                                                                             |                                                                                                                                                                                                                                                                 |
| 6908073 | BC051924 | Gsm7        | glutathione S-transferase, mu 7                                                   | 2.18504  | 1.57E-04 |                                                                                                                                                                                 |                                                                                                                                                                                                                                                                 |
| 6994927 | AB015790 | Sort1       | sortilin-related receptor, LDLR class A repeats-containing                        | 2.18045  | 5.51E-04 | LR11  SorLA-1  lpp250  FLJ21930  ILRP9  SorLA  SORLA  FLJ39258  C11orf32                                                                                                        | SwissProt: Q92673 # Likely to be a multifunctional endocytic receptor, that may be implicated in the uptake of lipoproteins and of proteases. Binds LDL, the major cholesterol-carrying lipoprotein of plasma, and transports it into cells by endocytosis. Bin |
| 6883105 | BC099427 | Wfdc2       | WAP four-disulfide core domain 2                                                  | 2.155865 | 1.74E-04 | MGC57529  IHE4  OTTHUMP0000031141  dJ461P17.6  IWAP5                                                                                                                            |                                                                                                                                                                                                                                                                 |
| 6753068 | AB232641 | S430435G22R | RIKEN cDNA S430435G22 gene                                                        | 2.140186 | 2.75E-04 |                                                                                                                                                                                 |                                                                                                                                                                                                                                                                 |
| 6889350 | BC116926 | Tcp111      | t-complex 11 like 1                                                               | 2.11933  | 5.91E-04 | FLJ11336  dJ85M6.3  FLJ11386                                                                                                                                                    |                                                                                                                                                                                                                                                                 |
| 6766623 | BC006783 | Ctcf        | connective tissue growth factor                                                   | 2.102829 | 2.45E-05 | IGFBP9  OTTHUMP0000017213  CCN2  MGC102839  NOV2  HCS24                                                                                                                         | SwissProt: P29279 # Major connective tissue mitotactant secreted by vascular endothelial cells. Promotes proliferation and differentiation of chondrocytes. Mediates heparin- and divalent cation-dependent cell adhesion in many cell types including fibro    |
| 6918858 | BC023500 | Slc2a5      | solute carrier family 2 (facilitated glucose transporter), member 5               | 2.094611 | 4.48E-05 | GLUT-5  GLUT5  OTTHUMP00000001704                                                                                                                                               | SwissProt: P22732 # Cytochalasin B-sensitive carrier. Seems to function primarily as a fructose transporter                                                                                                                                                     |
| 6775148 | BC010753 | Ddt         | D-dopachrome tautomerase                                                          | 2.091087 | 0.008187 | DDCT  EC 4.1.1.84                                                                                                                                                               | SwissProt: P30046 # Tautomerization of D-dopachrome with decarboxylation to give 5,6-dihydroxyindole (DHI)                                                                                                                                                      |
| 6768618 | BC034205 | Slc16a9     | solute carrier family 16 (monocarboxylic acid transporters), member 9             | 2.090044 | 6.94E-04 | FLJ43803  OTTHUMP0000017899  MCT9  C10orf36  OTTHUMP0000017898                                                                                                                  | SwissProt: Q7RTY1 # Proton-linked monocarboxylate transporter. Catalyzes the rapid transport across the plasma membrane of many monocarboxylates (By similarity)                                                                                                |
| 6777957 | AF367720 | Lrp1        | low density lipoprotein receptor-related protein 1                                | 2.089781 | 4.34E-04 | TGFBR5  IGFBP3R  AZMR  FLJ16451  CDP1  LRP  APOER  APR  MGC88725                                                                                                                | SwissProt: Q07954 # Endocytic receptor involved in endocytosis and in phagocytosis of apoptotic cells. Required for early embryonic development. Involved in cellular lipid homeostasis. Involved in the plasma clearance of phylomicon remnants and activated  |
| 6797579 | BC013651 | Serpina3n   | serine (or cysteine) peptidase inhibitor, clade A, member 3N                      | 2.080387 | 0.00222  |                                                                                                                                                                                 |                                                                                                                                                                                                                                                                 |
| 6908461 | BC051023 | S1pr1       | sphingosine-1-phosphate receptor 1                                                | 2.059599 | 3.43E-04 | CHEDG1  edg-1  OTTHUMP0000012525  D1S3362  ECG1  EDG1  S1P1  FLJ58121  EDG-1                                                                                                    | SwissProt: P21453 # Receptor for the lysosphingolipid sphingosine 1-phosphate (S1P). S1P is a bioactive lysosphingolipid that elicits diverse physiological effect on most types of cells and tissues. This inducible epithelial cell G-protein-coupled recepto |
| 6985252 | M96827   | Hp          | haptoglobin                                                                       | 2.031722 | 2.50E-04 | HP2-ALPHA-2  BP  HPA1S  MGC111141                                                                                                                                               | SwissProt: P00738 # Haptoglobin combines with free plasma hemoglobin, preventing loss of iron through the kidneys and protecting the kidneys from damage by hemoglobin, while making the hemoglobin accessible to degradative enzymes                           |
| 6929591 | J03783   | Il6         | interleukin 6                                                                     | 2.014849 | 9.06E-04 | HSF  BSF-2  BSF2  HGF  IL-6  CDF  IFNB2                                                                                                                                         | SwissProt: P05231 # IL-6 is a cytokine with a wide variety of biological functions: it plays an essential role in the final differentiation of B-cells into Ig-secreting cells, it induces myeloma and plasmacytoma growth, it induces nerve cells differentiat |
| 6990685 | BC012639 | Gsta4       | glutathione S-transferase, alpha 4                                                | 2.006552 | 9.37E-04 | OTTHUMP0000016624  GTA4  OTTHUMP0000016625  GSTA4-4  DKFZp686D21185  EC 2.5.1.18                                                                                                | SwissProt: O15217 # Conjugation of reduced glutathione to a wide number of exogenous and endogenous hydrophobic electrophiles. This isozyme has a high catalytic efficiency with 4-hydroxyalkenals such as 4-hydroxynonenal (4-HNE)                             |
| 6970857 | AF378831 | Gprc5b      | G protein-coupled receptor, family C, group 5, member B                           | 2.003906 | 2.93E-04 | RAIG2  RAIG-2  A-69G12.1                                                                                                                                                        | SwissProt: Q9NZH0 # Unknown. This retinoic acid-inducible G-protein coupled receptor provide evidence for a possible interaction between retinoid and G-protein signaling pathways                                                                              |

|         |          |             |                                                                                   |  |          |          |                                                                                                                                                                                  |  |                                                                                                                                                                                                                                                                  |
|---------|----------|-------------|-----------------------------------------------------------------------------------|--|----------|----------|----------------------------------------------------------------------------------------------------------------------------------------------------------------------------------|--|------------------------------------------------------------------------------------------------------------------------------------------------------------------------------------------------------------------------------------------------------------------|
| 6864700 | BC057889 | Cd14        | CD14 antigen                                                                      |  | -1.95988 | 3.48E-04 |                                                                                                                                                                                  |  | SwissProt: P08571 # Cooperates with MD-2 and TLR4 to mediate the innate immune response to bacterial lipopolysaccharide (LPS). Acts via MyD88, TRAP and TRAF6, leading to NF-kappa-B activation, cytokine secretion and the inflammatory response. Up-regulate   |
| 6871496 | BC058237 | Tmem138     | transmembrane protein 138                                                         |  | -1.96322 | 7.31E-04 | HSPC196                                                                                                                                                                          |  |                                                                                                                                                                                                                                                                  |
| 6990435 | BC008173 | Rab27a      | RAB27A, member RAS oncogene family                                                |  | -1.96843 | 2.75E-04 | Rab-27 [GS2] [RAB27] [Hs118676] [MG117246] [RAM]                                                                                                                                 |  |                                                                                                                                                                                                                                                                  |
| 6833306 | BC059832 | Acvr1b      | activin A receptor, type 1B                                                       |  | -1.96942 | 7.63E-05 | ALK-4 [SKR2] [ActRIB] [ACTR-IB] [ACVRLK4] [ALK4] [ACTRIB] [EC 2.7.11.30]                                                                                                         |  | SwissProt: P36896 # On ligand binding, forms a receptor complex consisting of two type II and two type I transmembrane serine/threonine kinases. Type II receptors phosphorylate and activate type I receptors which autophosphorylate, then bind and activate   |
| 6803319 | AB059648 | C1mn        | calmin                                                                            |  | -1.97411 | 1.61E-04 | KIAA0500 [KIAA1188] [FLJ43048] [calmin] [FLJ12383]                                                                                                                               |  |                                                                                                                                                                                                                                                                  |
| 6770201 | U44725   | Kitl        | kit ligand                                                                        |  | -1.98173 | 8.61E-04 | Kitl [SFC] [SCF] [MGF] [SHEP7] [DKFZp686F2250] [KL-1]                                                                                                                            |  | SwissProt: P21583 # Stimulates the proliferation of mast cells. Able to augment the proliferation of both myeloid and lymphoid hematopoietic progenitors in bone marrow culture. Mediates also cell-cell adhesion. Acts synergistically with other cytokines. p  |
| 6782087 | BC050007 | Cldn7       | claudin 7                                                                         |  | -1.98629 | 2.26E-04 | claudin-1 [CPETRL2] [CLDN-7] [Hs_64359] [CEPTRL2]                                                                                                                                |  | SwissProt: Q95471 # Plays a major role in tight junction-specific obliteration of the intercellular space (By similarity)                                                                                                                                        |
| 6965123 | BC051545 | 1190003J15R | RIKEN cDNA 1190003J15 gene                                                        |  | -1.9935  | 1.29E-04 |                                                                                                                                                                                  |  |                                                                                                                                                                                                                                                                  |
| 6900952 | AK040725 | A530020G20  | RIKEN cDNA A530020G20 gene                                                        |  | -1.9946  | 1.60E-04 |                                                                                                                                                                                  |  |                                                                                                                                                                                                                                                                  |
| 6838346 | BC082331 | Col2a1      | collagen, type II, alpha 1                                                        |  | -1.99784 | 4.24E-04 | COL11A3 [ANFH] [MGC131516] [chondrocalon] [OTTHUMP00000195063] [SEDC] [AOM]                                                                                                      |  | SwissProt: P02458 # Type II collagen is specific for cartilaginous tissues. It is essential for the normal embryonic development of the skeleton, for linear growth and for the ability of cartilage to resist compressive forces                                |
| 6850552 | AF233377 | Enpp5       | ectonucleotide pyrophosphatase/phosphodiesterase 5                                |  | -2.00318 | 9.11E-04 | OTTHUMP0000016543 [KIAA0879] [ENPP5] [OTTHUMP0000016542] [NPPP-5] [EC 3.1.-.-]                                                                                                   |  | SwissProt: Q9UJA9 # May play a role in neuronal cell communication. Lacks nucleotide pyrophosphatase and lysophospholipase D activity (By similarity)                                                                                                            |
| 6879015 | J03962   | Rapsn       | receptor-associated protein of the synapse                                        |  | -2.01249 | 4.17E-04 | CMS1E [rapsyn] [MGCS3597] [RNF205] [RAPsyn] [CMS1D]                                                                                                                              |  | SwissProt: Q13702 # Thought to play some role in anchoring or stabilizing the nicotinic acetylcholine receptor at synaptic sites. It may link the receptor to the underlying postsynaptic cytoskeleton, possibly by direct association with actin or spectrin    |
| 6784578 | BC028865 | Tanc2 Bzw1  | tetratricopeptide repeat, ankyrin repeat and coiled-coil containing 2   basic leu |  | -2.01359 | 0.001881 |                                                                                                                                                                                  |  |                                                                                                                                                                                                                                                                  |
| 7018687 |          | Zfhhc15     | zinc finger, DHHC domain containing 15                                            |  | -2.01663 | 7.61E-04 | OTTHUMP0000023583 [DHHC-15] [MGC119974] [FLJ1812] [MGC119975] [MGC119976] [MRX91] [EC 2.3.1.-]                                                                                   |  | SwissProt: Q96MV6 # Palmitoyltransferase specific for GAP43 and DLG4/PSD95 (By similarity)                                                                                                                                                                       |
| 6763129 | U43327   | Lamc2       | laminin, gamma 2                                                                  |  | -2.01903 | 9.55E-05 | MGC141938 [BM600-100kDa] [kalinin-105kDa] [hicein-100kDa] [EBR2A] [CSF] [OTTHUMP0000033550] [EBR2] [LAMB2T] [MGC138491] [LAMNB2] [leppigrin] [BM600] [JB2]                       |  | SwissProt: Q13753 # Binding to cells via a high affinity receptor, laminin is thought to mediate the attachment, migration and organization of cells into tissues during embryonic development by interacting with other extracellular matrix components. Lads1  |
| 6994353 | BC005498 | St14        | suppression of tumorigenicity 14 (colon carcinoma)                                |  | -2.02017 | 5.48E-06 | MTSP1 [Prostamin] [PRSS14] [Matrilase] [MTSP-1] [SNC19] [HAI] [TAGD15] [TAGD-15] [MT-SP1] [matrilase] [leppithin] [EC 3.4.21.109]                                                |  | SwissProt: Q9Y5Y6 # Degrades extracellular matrix. Proposed to play a role in breast cancer invasion and metastasis. Exhibits trypsin-like activity as defined by cleavage of synthetic substrates with Arg or Lys as the P1 site                                |
| 6760009 | BC010675 | Serpine2    | serine (or cysteine) peptidase inhibitor, clade E, member 2                       |  | -2.02185 | 3.22E-04 | nexin [PI7] [GDN] [PN-1] [PN1]                                                                                                                                                   |  | SwissProt: P016831 # Catalyzes the reversible phosphorytic cleavage of uridine and deoxyuridine to uracil and ribose- or deoxyribose-1-phosphate. The produced molecules are then utilized as carbon and energy sources or in the rescue of pyrimidine bases f   |
| 6778719 | D44464   | Upp1        | uridine phosphorylase 1                                                           |  | -2.02765 | 2.00E-04 | UDRPASE [UUP] [OTTHUMP00000159566] [UP] [UPASE] [EC 2.4.2.3]                                                                                                                     |  | SwissProt: Q43593 # May act as a transcription factor that could act on to regulate one of the phases of hair growth                                                                                                                                             |
| 6786049 | AY308745 | Cob1        | cordoon-bleu                                                                      |  | -2.02988 | 7.22E-05 | DKFZp686G13227 [MGC131893] [KIAA0633]                                                                                                                                            |  |                                                                                                                                                                                                                                                                  |
| 6820085 | BC049182 | Hr          | hairless                                                                          |  | -2.03376 | 9.68E-05 | AU [HSA277165] [OTTHUMP00000122609] [OTTHUMP00000159164] [ALLINC] [IFI-56] [IFI56] [GARG-16] [IFNA1] [ISG56] [IRNM561] [IFIT-1] [IFI-56K] [OTTHUMP0000020062] [G10P1] [FLJ12442] |  | SwissProt: Q96PL2 # One of the major non-collagenous components of the tectorial membrane (By similarity). The tectorial membrane is an extracellular matrix of the inner ear that covers the neuroepithelium of the cochlea and contacts the stereocilia bundle |
| 6870562 | X99806   | Tectb       | tectorin beta                                                                     |  | -2.05531 | 4.37E-04 | OTTHUMP0000020488 [MGC142057] [MGC142059] [KIAA1560]                                                                                                                             |  |                                                                                                                                                                                                                                                                  |
| 6792942 | BC030924 | Dtnb        | dystrobrevin, beta                                                                |  | -2.05999 | 7.23E-05 | MGC17163 [MGC57126] [Beta-dystrobrevin] [DTN-B]                                                                                                                                  |  |                                                                                                                                                                                                                                                                  |
| 6914765 | BC021501 | D4Bwg0951e  | DNA segment, Chr. 4, Brigham & Women's Genetics 0951 expressed                    |  | -2.05746 | 3.52E-04 |                                                                                                                                                                                  |  |                                                                                                                                                                                                                                                                  |
| 6817700 | BC005517 | Arhgef3     | Rho guanine nucleotide exchange factor (GEF) 3                                    |  | -2.06159 | 5.55E-05 | DKFZP434F2429 [MGC118905] [STA3] [FLJ98126] [XPLN] [GEF3] [DKFZp434F2429]                                                                                                        |  | SwissProt: Q9NR81 # Acts as guanine nucleotide exchange factor (GEF) for RhoA and RhoB GTPases                                                                                                                                                                   |
| 6763146 | BC022734 | Npl         | N-acetylneuraminatase pyruvate lyase                                              |  | -2.07266 | 2.50E-04 | C112 [C1orf13] [NALase] [MGC61869] [NPL1] [OTTHUMP0000033259] [MGC149582] [ct12] [EC 4.1.3.3]                                                                                    |  | SwissProt: Q9BXD5 # Catalyzes the cleavage of N-acetylneuraminic acid (sialic acid) to form pyruvate and N-acetylmannosamine via a Schiff base intermediate. It prevents sialic acids from being recycled and returning to the cell surface (By similarity)      |
| 6837784 | BC021640 | Mapk12      | mitogen-activated protein kinase 12                                               |  | -2.07861 | 4.41E-06 | ERK5 [P38GAMMA] [p38gamma] [ERK5] [ERK6] [ERK-6] [PRKM12] [SAPK3] [SAPK-3] [EC 2.7.11.24]                                                                                        |  | SwissProt: P53778 # Responds to activation by environmental stress and pro-inflammatory cytokines by phosphorylating downstream targets. Plays a role in myoblast differentiation and also in the down-regulation of cyclin D1 in response to hypoxia in adrena  |
| 6843685 | AF126834 | Ppl         | periplakin                                                                        |  | -2.09348 | 4.96E-04 | MGC134872 [KIAA0568] [OTTHUMP00000159922]                                                                                                                                        |  | SwissProt: Q60437 # Component of the cornified envelope of keratinocytes. May link the cornified envelope to desmosomes and intermediate filaments. May act as a localization signal in PKB/AKT-mediated signaling                                               |
| 6798213 |          | Tnfrsf2     | tumor necrosis factor, alpha-induced protein 2                                    |  | -2.10454 | 1.15E-05 | B94                                                                                                                                                                              |  | SwissProt: Q03169 # May play a role as a mediator of inflammation and angiogenesis                                                                                                                                                                               |
| 6884750 |          | Itga8       | integrin alpha 8                                                                  |  | -2.11445 | 7.04E-06 | OTTHUMP00000019207                                                                                                                                                               |  | SwissProt: P53708 # Integrin alpha-8/beta-1 functions in the genesis of kidney and probably of other organs by regulating the recruitment of mesenchymal cells into epithelial structures. It recognizes the sequence R-G-D in a wide array of ligands includin  |
| 6790291 | U15209   | Cc9         | chemokine (C-C motif) ligand 9                                                    |  | -2.11719 | 4.19E-05 |                                                                                                                                                                                  |  |                                                                                                                                                                                                                                                                  |
| 6886630 | BC066975 | 1110032E23R | RIKEN cDNA 1110032E23 gene                                                        |  | -2.13394 | 7.79E-05 |                                                                                                                                                                                  |  |                                                                                                                                                                                                                                                                  |
| 6899375 | AY465109 | S100a7a     | S100 calcium binding protein A7A                                                  |  | -2.13466 | 4.36E-04 | S100A15 [OTTHUMP00000015324] [S100A7] [OTTHUMP00000015326] [OTTHUMP00000015325] [INICE-2] [S100A7L1]                                                                             |  | SwissProt: Q86SG5 # May be involved in epidermal differentiation and inflammation and might therefore be important for the pathogenesis of psoriasis and other diseases                                                                                          |
|         |          |             |                                                                                   |  |          |          |                                                                                                                                                                                  |  | SwissProt: Q7656 # Uses a threshold response for the hydrolysis of ATP                                                                                                                                                                                           |

|         |          |              |                                                                              |          |          |                                                                                                                               |                                                                                                                                                                                                                                                                             |
|---------|----------|--------------|------------------------------------------------------------------------------|----------|----------|-------------------------------------------------------------------------------------------------------------------------------|-----------------------------------------------------------------------------------------------------------------------------------------------------------------------------------------------------------------------------------------------------------------------------|
| 6890710 | BC006826 | Mal          | myelin and lymphocyte protein, T-cell differentiation protein                | -2.26183 | 1.68E-04 |                                                                                                                               | SwissProt: P21145 # Could be an important component in vesicular trafficking cycling between the Golgi complex and the apical plasma membrane. Could be involved in myelin biogenesis and/or myelin function                                                                |
| 6900071 | M35075   | Ngf          | nerve growth factor                                                          | -2.26688 | 5.96E-05 | NID67 [OTTHUMP00000013653 [MGC161428 [HSAN5 [Beta-NGF [MGC161428 [NGF3                                                        | SwissProt: P01138 # Nerve growth factor is important for the development and maintenance of the sympathetic and sensory nervous systems. It stimulates division and differentiation of sympathetic and embryonic sensory neurons                                            |
| 6791422 | BC040757 | Jup          | junction plakoglobin                                                         | -2.27105 | 1.02E-04 | PKGB [PDGB [CTNNG [ARVD12 [gamma-catenin [OTTHUMP00000164735 [DP3 [DPIII [Desmoplakin-3                                       | SwissProt: P14823 # Common junctional plaque protein. The membrane-associated plaques are architectural elements in an important strategic position to influence the arrangement and function of both the cytoskeleton and the cells within the tissue. The pre             |
| 6785183 | BC080751 | Itgb4        | integrin beta 4                                                              | -2.27417 | 1.34E-04 | CD104 [GP150                                                                                                                  | SwissProt: P16144 # Integrin alpha-6/beta-4 is a receptor for laminin. It plays a critical structural role in the hemidesmosome of epithelial cells                                                                                                                         |
| 6792260 | BC006965 | BC006965     |                                                                              | -2.27459 | 3.76E-06 |                                                                                                                               |                                                                                                                                                                                                                                                                             |
| 6939888 | BC039934 | Rasaf6       | Ras association (RalGDS/AF-6) domain family member 6                         | -2.2804  | 3.24E-05 | DKFZp686K23225                                                                                                                | SwissProt: Q62TQ3 # May act as a Ras effector protein                                                                                                                                                                                                                       |
| 6844955 | BC048410 | Atp13a4      | ATPase type 13A4                                                             | -2.2842  | 1.14E-04 | DKFZp76111011 [MGC126545 [IEC 3.6.3.-                                                                                         |                                                                                                                                                                                                                                                                             |
| 6966329 | BC004672 | Lsr          | lipolysis stimulated lipoprotein receptor                                    | -2.28749 | 1.28E-04 | MGC48312 [LUSCH7 [ILDR3 [LUSCH [MGC48503 [MGC10659                                                                            | SwissProt: Q96X29 # Probable role in the clearance of triglyceride-rich lipoprotein from blood. Binds chylomicrons, LDL and VLDL in presence of free fatty acids and allows their subsequent uptake in the cells (By similarity)                                            |
| 6772417 | BC050259 | Tnfrsf3      | tumor necrosis factor, alpha-induced protein 3                               | -2.28785 | 3.58E-05 | OTUD7C [OTTHUMP00000017289 [MGC138688 [A20 [MGC138687 [TNFAIP2 [MGC104522 [IEC 3.6.3.-                                        | SwissProt: P21580 # Interacts with NAF1 and inhibits TNF-induced NF-kappa-B-dependent gene expression by interfering with an RIP- or TRAF2-mediated transactivation signal. Inhibitor of programmed cell death. Has a role in the function of the lymphoid cyst             |
| 6814355 | BC019952 | Nkd2         | naked cuticle 2 homolog (Drosophila)                                         | -2.30698 | 7.76E-04 | hNkd2 [Naked2 [Naked-2                                                                                                        | SwissProt: Q969F2 # Cell autonomous antagonist of the canonical Wnt signaling pathway. May activate a second Wnt signaling pathway that controls planar cell polarity (By similarity). Required for processing of TGFalpha and for targeting of TGFalpha to the basolateral |
| 6873167 | BC057060 | BC023055     |                                                                              | -2.31417 | 0.001862 |                                                                                                                               |                                                                                                                                                                                                                                                                             |
| 6974663 | BC094662 | Strp1        | secreted frizzled-related protein 1                                          | -2.32355 | 6.44E-05 | Fiza [SARP2 [FRP1 [FRP-1 [SARP-2 [FRP [SFRP-1                                                                                 | SwissProt: Q8N474 # Soluble frizzled-related proteins (sFRPs) function as modulators of Wnt signaling through direct interaction with Wnts. They have a role in regulating cell growth and differentiation in specific cell types. SFRP1 decreases intracellular            |
| 6957789 | BC016890 | Eps8         | epidermal growth factor receptor pathway substrate 8                         | -2.3319  | 2.30E-06 |                                                                                                                               | SwissProt: Q12929 # Upon binding to EGF receptor enhances EGF-dependent mitogenic signals. Can bind multiple cellular targets                                                                                                                                               |
| 6966198 | BC026419 | Spint2       | serine protease inhibitor, Kunitz type 2                                     | -2.33198 | 1.61E-04 | FLJ45571 [HAI-2 [Kop [PB [HAI2 [KOP                                                                                           | SwissProt: Q43291 # Inhibitor of HGF activator. Also inhibits plasmin, plasmin and tissue kallikrein, and factor Xla                                                                                                                                                        |
| 6769662 | AY484428 | Slc5a8       | solute carrier family 5 (codie transporter), member 8                        | -2.3512  | 7.29E-06 | AIT [SMCT [MGC125354 [SMCT1                                                                                                   | SwissProt: Q8N695 # Acts as an electrogenic sodium (Na+) and chloride (Cl-)-dependent sodium-coupled solute transporter, including transport of monocarboxylates (short-chain fatty acids including L-lactate, D-lactate, pyruvate, acetate, propionate, valate             |
| 6778044 | BC106091 | ErbB3        | v-erb-b2 erythroblastic leukemia viral oncogene homolog 3 (avian)            | -2.35403 | 2.14E-05 | c-erbB-3 [LCCS2 [c-erbB3 [erbB-3 [p180-ErbB3 [p85-sErbB3 [p45-sErbB3 [erbB-3 [erbB3-5 [MGC88033 [HER3 [MDA-BF-1 [IEC 2.7.10.1 | SwissProt: P21860 # Binds and is activated by neuregulins and NTKA                                                                                                                                                                                                          |
| 6931961 | BC088989 | Lphn3        | latrophilin 3                                                                | -2.39223 | 1.06E-05 | KIAA0758 [LEC3 [Lectomedin-3 [CIRL3                                                                                           |                                                                                                                                                                                                                                                                             |
| 6957632 | BC039930 | Mansc1       | MANSO domain containing 1                                                    | -2.41353 | 8.06E-05 | 9130403P13Rik [FLJ10298                                                                                                       |                                                                                                                                                                                                                                                                             |
| 7020678 | AF192978 | Car5b        | carbonic anhydrase 5b, mitochondrial                                         | -2.43673 | 2.56E-04 | LOH12CR3                                                                                                                      |                                                                                                                                                                                                                                                                             |
| 6830480 | BC113154 | Mal2         | mal, T-cell differentiation protein 2                                        | -2.4467  | 0.001248 |                                                                                                                               | SwissProt: Q968L2 # Member of the machinery of polarized transport. Required for the indirect transcytotic route at the step of the egress of the transcytosing cargo from perinuclear endosomes in order for it to travel to the apical surface via the raft-dep           |
| 6767231 | U59865   | Lama4        | laminin, alpha 4                                                             | -2.45631 | 7.12E-05 | LAMA3 [LAMA4*-1 [DKFZp686D23145 [OTTHUMP00000017039 [OTTHUMP00000017043                                                       | SwissProt: Q16363 # Binding to cells via a high affinity receptor, laminin is thought to mediate the attachment, migration and organization of cells into tissues during embryonic development by interacting with other extracellular matrix components                    |
| 6770160 | BC003869 | Dusp6        | dual specificity phosphatase 6                                               | -2.47016 | 8.75E-05 | PYST1 [MKP3 [MKP-3 [IEC 3.1.3.48.EC 3.1.3.16                                                                                  | SwissProt: Q16828 # Inactivates MAP kinases. Has a specificity for the ERK family                                                                                                                                                                                           |
| 7018664 | BC096587 | Slc16a2      | solute carrier family 16 (monocarboxylic acid transporters), member 2        | -2.48411 | 2.29E-04 | AHDS [XPCT [DXS128E [DXS128 [MXR22 [MCT8 [MCT7                                                                                | SwissProt: P36021 # Very active and specific thyroid hormone transporter. Stimulates cellular uptake of thyroxine (T4), triiodothyronine (T3), reverse triiodothyronine (rT3) and diiodothyronine. Does not transport Leu, Phe, Trp or Tyr (By similarity)                  |
| 6870125 | BC018383 | ina          | internexin neuronal intermediate filament protein, alpha                     | -2.51443 | 6.24E-04 | FLJ57501 [MGC12702 [Alpha-Inx [OTTHUMP00000020403 [FLJ18662 [NF-66 [NEF5 [TXBP-1 [Neurofilament 66                            | SwissProt: Q16352 # Class-IV neuronal intermediate filament that is able to self-assemble. It is involved in the morphogenesis of neurons. It may form an independent structural network without the involvement of other neurofilaments or it may cooperate wi             |
| 6759664 | L12447   | Igf1bp5      | insulin-like growth factor binding protein 5                                 | -2.51758 | 3.76E-07 | IGFBP-5 [IBP5 [IBP-5                                                                                                          | SwissProt: P24593 # IGF-binding proteins prolong the half-life of the IGFs and have been shown to either inhibit or stimulate the growth promoting effects of the IGFs on cell culture. They alter the interaction of IGFs with their cell surface receptors                |
| 6767782 | BC006591 | Llrb4 [Sp49a | leukocyte immunoglobulin-like receptor, subfamily B, member 4   glycoprotein | -2.53264 | 0.005183 |                                                                                                                               |                                                                                                                                                                                                                                                                             |
| 6931520 | BC029551 | Atp10d       | ATPase, class V, type 10D                                                    | -2.54665 | 1.56E-05 | KIAA1487 [ATPVD [IEC 3.6.3.1                                                                                                  |                                                                                                                                                                                                                                                                             |
| 6991264 | U06119   | Ctsh         | cathepsin H                                                                  | -2.55095 | 3.47E-04 | MGC1519 [ACC-5 [DKFZp686B24257 [aleurain [CPSB [ACC-4 [minichain [IEC 3.4.22.16                                               | SwissProt: P09668 # Important for the overall degradation of proteins in lysosomes                                                                                                                                                                                          |
| 6998434 | BC139826 | Acpp         | acid phosphatase, prostate                                                   | -2.55958 | 3.21E-06 | ACP-3 [IPAP [JACP3 [IEC 3.1.3.2                                                                                               |                                                                                                                                                                                                                                                                             |
| 6817381 | BC120709 | Plau         | plasminogen activator, urokinase                                             | -2.59843 | 2.18E-04 | UPA [UROKINASE [u-PA [ATF [LUPA [OTTHUMP00000019849 [URK [IEC 3.4.21.73                                                       | SwissProt: P00749 # Specifically cleave the zymogen plasminogen to form the active enzyme plasmin                                                                                                                                                                           |
| 6799463 | BC006921 | Id2          | inhibitor of DNA binding 2                                                   | -2.61161 | 0.002206 | MGC26389 [ID2A [ID2H [IGI8 [OTTHUMP00000140258 [IdHLHb26                                                                      | SwissProt: Q02363 # ID (inhibitor of DNA binding) HLH proteins lack a basic DNA-binding domain but are able to form heterodimers with other HLH proteins, thereby inhibiting DNA binding. ID-2 may be an inhibitor of tissue-specific gene expression                       |
| 6931001 | AB006758 | Pcdh7        | protocadherin 7                                                              | -2.61356 | 2.71E-05 | BHPCDH [BH-Pcdh                                                                                                               |                                                                                                                                                                                                                                                                             |
| 6906762 | BC006624 | Rab25        | RAB25, member RAS oncogene family                                            | -2.63865 | 7.96E-05 | CATX-8 [CATX8 [OTTHUMP00000018847                                                                                             | SwissProt: P57735 # May selectively regulate the apical recycling and/or transcytotic pathways (By similarity)                                                                                                                                                              |
| 6847556 | BC050834 | Adamts1      | a disintegrin-like and metalloproteinase (prolysin type) with thrombospondin | -2.7387  | 1.59E-04 | METH-1 [KIAA1346 [C3-C5 [ADAMTS 1 [ADAM-TS1 [METH1 [IEC 3.4.24.-                                                              | SwissProt: Q9UH18 # Cleaves aggrecan, a cartilage proteoglycan, and may be involved in its turnover (By similarity). Has angiogenic inhibitor activity. Active metalloproteinase, which may be associated with various inflammatory processes as well as developm           |
| 6818186 | BC030407 | Anxa8        | annexin A8                                                                   | -2.80774 | 9.46E-05 | VAC-beta [ANX8 [Annexin-8 [FLJ53095                                                                                           | SwissProt: P13928 # This protein is an anticoagulant protein that acts as an indirect inhibitor of the thromboplastin-specific complex, which is involved in the blood coagulation cascade                                                                                  |
| 6701854 | BC006739 | Pcdh5        | protocadherin 5                                                              | -2.83196 | 9.64E-04 | EBRR3                                                                                                                         | SwissProt: P16017 # Secretory vesicle-mediated anterograde transport protein                                                                                                                                                                                                |

|         |          |           |                                                             |          |          |                                                                                                                                                                                        |                                                                                                                                                                                                                                                                 |
|---------|----------|-----------|-------------------------------------------------------------|----------|----------|----------------------------------------------------------------------------------------------------------------------------------------------------------------------------------------|-----------------------------------------------------------------------------------------------------------------------------------------------------------------------------------------------------------------------------------------------------------------|
| 6931759 | BC052457 | Kit       | kit oncogene                                                | -3.50492 | 1.21E-04 | SCFR [PBT [c-kit [CD117 [C-Kit [EC 2.7.10.1                                                                                                                                            | SwissProt: P10721 # This is the receptor for stem cell factor (mast cell growth factor). It has a tyrosine-protein kinase activity. Binding of the ligands leads to the autophosphorylation of KIT and its association with substrates such as phosphatidylinos |
| 6749352 | BC027005 | Sdpr      | serum deprivation response                                  | -3.52034 | 3.33E-04 | FS-p88 [SDPR                                                                                                                                                                           | SwissProt: O95810 # May play a role in targeting PRKCA to caveolae (By similarity)                                                                                                                                                                              |
| 6829871 | BC055035 | Grh2      | grainyhead-like 2 (Drosophila)                              | -3.52892 | 1.73E-05 | DFNA28 [BOM [MGC149295 [MGC149294 [FLJ13782 [FLJ11172 [TFCP2L3                                                                                                                         | SwissProt: Q615B3 # May function as a transcription factor                                                                                                                                                                                                      |
| 6979695 | BC054790 | Cdh5      | cadherin 5                                                  | -3.58815 | 1.91E-05 | CD144 [7B4 [FLJ17376 [VE-cadherin                                                                                                                                                      | SwissProt: P33151 # Cadherins are calcium dependent cell adhesion proteins. They preferentially interact with themselves in a homophilic manner in connecting cells; cadherins may thus contribute to the sorting of heterogeneous cell types. This cadherin ma |
| 6946749 | EF585494 | Trip3     | TNFAIP3 interacting protein 3                               | -3.71902 | 2.48E-05 | FLJ21162 [ABIN-3 [ABIN3 [LIND                                                                                                                                                          |                                                                                                                                                                                                                                                                 |
| 6899010 | BC034092 | Mme       | membrane metallo endopeptidase                              | -3.72295 | 2.42E-05 | NEP [enkephalinase [DKFz686O16152 [EPN [neprilysin [enkephalinase [atriopeptidase [MGC126681 [atriopeptidase [CD10 [MGC126707 [CALLA [EC: 3.4.24.11                                    | SwissProt: P08473 # Thermolysin-like specificity, but is almost confined on acting on polypeptides of up to 30 amino acids. Biologically important in the destruction of opioid peptides such as Met- and Leu-enkephalins by cleavage of a Gly-Phe bond. Involv |
| 6752156 | X16490   | Serpintb2 | serine (or cysteine) peptidase inhibitor, clade B, member 2 | -3.7488  | 1.43E-04 | PLANH2 [HsT1201 [PAI-2 [PAI2 [PAI                                                                                                                                                      | SwissProt: P05120 # Inhibits urokinase-type plasminogen activator. The monocyte derived PAI-2 is distinct from the endothelial cell-derived PAI-1                                                                                                               |
| 6916247 | BC065139 | Iiga2     | integrin alpha 2                                            | -3.87336 | 9.23E-08 | GPIa [CD49B [VLA-2 [VLA-2 [CD49b [BR                                                                                                                                                   | SwissProt: P17301 # Integrin alpha-2/beta-1 is a receptor for laminin, collagen, collagen C-propeptides, fibronectin and E-cadherin. It recognizes the proline-hydroxylated sequence G-F-P-G-E-R in collagen. It is responsible for adhesion of platelets and o |
| 6919693 | BC031468 | Rbm35a    | RNA binding motif protein 35A                               | -3.87665 | 1.52E-05 | FLJ20171                                                                                                                                                                               |                                                                                                                                                                                                                                                                 |
| 6889273 | BC005520 | Ehf       | ets homologous factor                                       | -3.88182 | 5.04E-06 | NEHF [ESE3 [ESE3B [ESEJ [ESE-3                                                                                                                                                         | SwissProt: O9NZC4 # Transcriptional activator that may play a role in regulating epithelial cell differentiation and proliferation. May act as a repressor for a specific subset of ETS/AP-1-responsive genes and as a modulator of the nuclear response to mit |
| 6834877 | BC030399 | Npal2     | NIPA-like domain containing 2                               | -3.91187 | 3.62E-05 | FLJ13955                                                                                                                                                                               |                                                                                                                                                                                                                                                                 |
| 6872051 | AF174583 | Gda       | guanine deaminase                                           | -4.0138  | 7.15E-06 | p51-nedasin [SLC25A16 [MGC9982 [Guanase [D10S105E [INEDASIN [CYPIN [GAH [GUANASE [OTTHUMP0000021463 [KIAA1258 [EC: 3.5.4.3                                                             | SwissProt: Q9Y2T3 # Catalyzes the hydrolytic deamination of guanine, producing xanthine and ammonia (By similarity)                                                                                                                                             |
| 6932364 | BC024392 | Cxcl5     | chemokine (C-X-C motif) ligand 5                            | -4.02713 | 3.75E-04 | ENA-78 [ENA78 [ENA-78(1-78) [SCYB5                                                                                                                                                     | SwissProt: P42830 # Involved in neutrophil activation. In vitro, ENA-78(8-78) and ENA-78(9-78) show a threefold higher chemotactic activity for neutrophil granulocytes                                                                                         |
| 6963003 | AB031550 | Stard10   | START domain containing 10                                  | -4.34763 | 2.72E-05 | SDCCAG28 [PCTP-L [MGC14401 [PCTP2 [NY-CO-28 [SIARD10 [CGI-52                                                                                                                           | SwissProt: Q9Y365 # May play specific roles in sperm maturation or fertilization (By similarity)                                                                                                                                                                |
| 6783484 | BC034841 | Tmem100   | transmembrane protein 100                                   | -4.4141  | 3.86E-04 | FLJ10970 [FLJ37856                                                                                                                                                                     |                                                                                                                                                                                                                                                                 |
| 6974250 | AF125308 | Cln8      | ceroid-lipofuscinosis, neuronal 8                           | -4.50282 | 6.65E-05 | FLJ39417 [EPMR [C8orf61                                                                                                                                                                |                                                                                                                                                                                                                                                                 |
| 7018955 | BC054113 | Rps6ka6   | ribosomal protein S6 kinase polypeptide 6                   | -4.88794 | 1.48E-04 | RSK4 [OTTHUMP0000023618 [pp90RSK4 [RSK-4 [EC: 2.7.11.1                                                                                                                                 | SwissProt: Q9LJK2 # Serine/threonine kinase that may play a role in mediating the growth-factor and stress induced activation of the transcription factor CREB                                                                                                  |
| 6769304 | X73359   | Aes       | amino-terminal enhancer of split                            | -5.03265 | 1.82E-05 | AES-2 [GRG5 [GRG [AES-1 [JESP1 [TLES                                                                                                                                                   | SwissProt: Q08117 # Acts as dominant repressor towards other family members. Inhibits NF-kappa-B-regulated gene expression. May be required for the initiation and maintenance of the differentiated state                                                      |
| 6819877 | BC016096 | Scara5    | scavenger receptor class A, member 5 (putative)             | -5.67547 | 1.14E-04 | Tesr [FLJ23907 [MGC45780                                                                                                                                                               |                                                                                                                                                                                                                                                                 |
| 6917273 | BC019563 | Tmem54    | transmembrane protein 54                                    | -5.87061 | 2.27E-04 | [CAC-1 [BCLP [CAC1                                                                                                                                                                     |                                                                                                                                                                                                                                                                 |
| 6979914 | AF033017 | Kcnc1     | potassium channel, subfamily K, member 1                    | -6.2182  | 6.41E-05 | TWIK-1 [K2p1.1 [OTTHUMP0000036029 [TWIK1 [DPK [KCNQ1 [HOHO1 [HOHO                                                                                                                      | SwissProt: O00180 # Weakly inward rectifying potassium channel                                                                                                                                                                                                  |
| 6753400 | BC031131 | Lad1      | ladinin                                                     | -7.09833 | 6.69E-07 | LADA [Lad-1 [OTTHUMP0000033878 [MGC10355 [LadA [LAD                                                                                                                                    | SwissProt: O00515 # Anchoring filament protein which is a component of the basement membrane zone (By similarity)                                                                                                                                               |
| 6833382 | M11686   | Krt18     | keratin 18                                                  | -7.22056 | 1.32E-04 | K18 [CYK18 [Keratin-18 [Cytokeratin-18 [CK-18                                                                                                                                          | SwissProt: P05783 # Involved in the uptake of thrombin-antithrombin complexes by hepatic cells (By similarity). When phosphorylated, plays a role in filament reorganization. Involved in the delivery of mutated CFTR to the plasma membrane. Together with KR |
| 6905530 | BC119599 | Gpr149    | G protein-coupled receptor 149                              | -9.46421 | 5.43E-06 | IEDA [PGR10                                                                                                                                                                            | SwissProt: Q863P6 # Orphan receptor                                                                                                                                                                                                                             |
| 6852882 | BC094465 | Tacstd1   | tumor-associated calcium signal transducer 1                | -14.0999 | 4.35E-07 | TROP1 [TACST-1 [MK-1 [M1S2 [ESA [CD326 [Ep-CAM [EGP40 [MOC31 [TACSTD1 [HEA125 [CO-17A [EGP [MH99 [EGP-2 [EGP34 [KS1/4 [M4S1 [323/43 [Jy74 [KSA [17-1A [HEGP-2 [CO17-1A [MIC18 [GA733-2 | SwissProt: P16422 # GA733 tumor-associated antigen gene family may function as growth factor receptors                                                                                                                                                          |
